# Supplementary material for: Antimicrobial and Antibiofilm Activity and Machine Learning Classification Analysis of Essential Oils from Different Mediterranean Plants against Pseudomonas aeruginosa
Source: PubMed Central journal article supplement (PMC6017904; doi:10.3390/molecules23020482), 2018-02-23
Supplement: molecules-23-00482-s001.pdf [file molecules-23-00482-s001.pdf]

## Supplementary Material

---

### **Antimicrobial and antibiofilm activity and machine learning classification analysis of essential oils from different Mediterranean plants against *Pseudomonas aeruginosa***

Marco Artini<sup>1,§</sup>, Alexandros Patsilidakos<sup>2,3,5,§</sup>, Rosanna Papa<sup>1</sup>, Mijat Božović<sup>2,4</sup>, Manuela Sabatino<sup>2,3</sup>, Stefania Garzoli<sup>2</sup>, Gianluca Vrenna<sup>1</sup>, Marco Tilotta<sup>1</sup>, Federico Pepi<sup>2</sup>, Rino Ragno<sup>2,3,5,\*</sup> and Laura Selan<sup>1</sup>

<sup>1</sup> Department of Public Health and Infectious Diseases, Sapienza University, P.le Aldo Moro 5, 00185 Rome, Italy

<sup>2</sup> Department of Drug Chemistry and Technology, Sapienza University, P.le Aldo Moro 5, 00185 Rome, Italy; stefania.garzoli@uniroma1.it (S.G.), federico.pepi@uniroma1.it (F.P.)

<sup>3</sup> Rome Center for Molecular Design, Department of Drug Chemistry and Technology, Sapienza University, P.le Aldo Moro 5, 00185 Rome, Italy; mijat.bozovic@uniroma1.it (M.B.)

<sup>4</sup> Faculty of Natural Sciences and Mathematics, University of Montenegro, Džordža Vašingtona bb, 81000 Podgorica, Montenegro;

<sup>5</sup> Alchemical Dynamics s.r.l., 00125 Rome, Italy;

\* Corresponding authors:

rino.ragno@uniroma1.it (R.R.), tel.: +39-6-4991-3937; fax: +39-6-4991-3627

§ M.A. and A.P. contributed equally to the paper

**Table S1.** GB parameters used in the grid search for optimal hyperparameterization

|                         |     |     |     |     |      |      |                   |                   |
|-------------------------|-----|-----|-----|-----|------|------|-------------------|-------------------|
| <b>N estimators</b>     | 100 | 250 | 500 | 750 | 1000 | 1250 | 1500              | 1750              |
| <b>Max depth</b>        | 3   | 4   | 5   | 6   | 7    | 8    | 9                 | 10                |
| <b>Min samples leaf</b> | 1   | 3   | 5   | 7   | 9    | 11   | 13                | 15                |
| <b>Max features</b>     | 0.7 | 0.6 | 0.5 | 0.4 | 0.3  | 0.2  | log2 <sup>a</sup> | sqrt <sup>b</sup> |

<sup>a</sup> sqrt: max features = sqrt(n features). <sup>b</sup> log2: max features = log2(n features)

**Table S2.** Relative yields % of EOs over time.

| Plant species | <b>h</b> <sup>1</sup> | <b>1</b> | <b>2</b> | <b>3</b> | <b>6</b> | <b>12</b> | <b>24</b> |
|---------------|-----------------------|----------|----------|----------|----------|-----------|-----------|
|               | <b>m</b> <sup>2</sup> |          |          |          |          |           |           |
| <b>CG</b>     | <i>Jul.</i>           | 0.300    | 0.350    | 0.360    | 0.366    | 0.370     | 0.373     |
|               | <i>Aug.</i>           | 0.300    | 0.360    | 0.400    | 0.420    | 0.426     | 0.432     |
|               | <i>Sep.</i>           | 0.190    | 0.250    | 0.300    | 0.360    | 0.376     | 0.381     |
|               | <i>Oct.</i>           | 0.180    | 0.260    | 0.290    | 0.320    | 0.328     | 0.328     |
| <b>FV</b>     | <i>Aug.</i>           | 0.070    | 0.110    | 0.140    | 0.180    | 0.196     | 0.213     |
|               | <i>Sep.</i>           | 0.090    | 0.140    | 0.170    | 0.200    | 0.218     | 0.240     |
|               | <i>Oct.</i>           | 0.360    | 0.640    | 0.830    | 1.090    | 1.210     | 1.250     |
| <b>RS</b>     | <i>na</i>             | 0.200    | 0.300    | 0.440    | 0.640    | 0.740     | 0.800     |

<sup>1</sup> Extraction hour, <sup>2</sup> Month of harvesting, na – not applicable.

**Table S3.** EO Yield % calculated on the dried (FV and RS) or fresh (CG) plant material.

| Plant species | <b>h</b> <sup>1</sup> | <b>1</b> | <b>2</b> | <b>3</b> | <b>6</b> | <b>12</b> | <b>24</b> |
|---------------|-----------------------|----------|----------|----------|----------|-----------|-----------|
|               | <b>m</b> <sup>2</sup> |          |          |          |          |           |           |
| <b>CG</b>     | <i>Jul.</i>           | 0.300    | 0.050    | 0.010    | 0.006    | 0.004     | 0.003     |
|               | <i>Aug.</i>           | 0.300    | 0.060    | 0.040    | 0.020    | 0.006     | 0.006     |
|               | <i>Sep.</i>           | 0.190    | 0.060    | 0.050    | 0.060    | 0.016     | 0.005     |
|               | <i>Oct.</i>           | 0.180    | 0.080    | 0.030    | 0.030    | 0.008     | 0.0004    |
| <b>FV</b>     | <i>Aug.</i>           | 0.070    | 0.040    | 0.030    | 0.040    | 0.016     | 0.017     |
|               | <i>Sep.</i>           | 0.090    | 0.050    | 0.030    | 0.030    | 0.018     | 0.022     |
|               | <i>Oct.</i>           | 0.360    | 0.280    | 0.190    | 0.260    | 0.120     | 0.040     |
| <b>RS</b>     | <i>na</i>             | 0.200    | 0.100    | 0.140    | 0.200    | 0.100     | 0.060     |

<sup>1</sup> Extraction hour, <sup>2</sup> Month of harvesting, na – not applicable.

**Table S4.** Chemical composition (%) of the most active FVEO samples.

| # <sup>1</sup> | Name                      | Sample <sup>2</sup> |            |            |            |             |            |            |            |            |            |            |
|----------------|---------------------------|---------------------|------------|------------|------------|-------------|------------|------------|------------|------------|------------|------------|
|                |                           | A1h                 | A3h        | A6h        | A12h       | AM1         | AM2        | AM3        | AM4        | S1h        | OM1        | OM4        |
| <b>1</b>       | <i>α</i> -pinene          | -                   | 2.9        | 4.9        | 1.1        | 1.0         | 7.0        | 3.9        | 3.3        | 1.9        | 4.3        | 19.6       |
| <b>2</b>       | <i>β</i> -pinene          | -                   | -          | -          | -          | -           | -          | -          | -          | -          | 3.3        | 1.4        |
| <b>3</b>       | <i>β</i> -terpinene       | -                   | -          | -          | -          | -           | 0.4        | 0.9        | 0.6        | -          | -          | -          |
| <b>4</b>       | <i>β</i> -myrcene         | 1.6                 | 1.4        | 1.5        | 0.8        | 0.2         | 0.4        | 1.0        | 1.1        | 1.4        | 3.0        | 2.0        |
| <b>5</b>       | <i>α</i> -phellandrene    | 18.3                | 6.1        | 20.5       | 3.9        | 0.4         | 0.7        | 1.0        | 10.5       | 13.0       | 2.7        | 7.7        |
| <b>6</b>       | d-limonene                | 7.5                 | 7.0        | 8.2        | 3.7        | 1.8         | 3.4        | 6.8        | 6.0        | 12.4       | 1.0        | 4.4        |
| <b>7</b>       | <i>β</i> -phellandrene    | 6.6                 | 4.1        | 4.6        | 2.2        | 1.2         | 2.2        | 5.0        | 4.4        | 6.8        | 1.1        | 1.6        |
| <b>8</b>       | <i>γ</i> -terpinene       | 1.1                 | 1.1        | 2.6        | 0.8        | 0.1         | 0.2        | 1.0        | 1.1        | 1.5        | 3.9        | 1.6        |
| <b>9</b>       | <i>o</i> -cymene          | 35.5                | 25.2       | 19.1       | 14.0       | 16.0        | 23.5       | 35.3       | 28.7       | 52.5       | 1.5        | 2.9        |
| <b>10</b>      | terpinolene               | -                   | -          | -          | -          | -           | -          | -          | -          | -          | 0.1        | 0.5        |
| <b>11</b>      | fenchone                  | 2.4                 | 1.3        | 0.4        | 0.2        | 4.8         | 2.6        | 2.0        | 1.7        | -          | 4.8        | 8.8        |
| <b>12</b>      | dehydro- <i>p</i> -cymene | 0.2                 | 0.5        | 0.6        | 1.8        | -           | -          | -          | -          | -          | -          | -          |
| <b>13</b>      | isomenthone               | 0.5                 | 1.1        | 1.0        | 2.2        | -           | -          | -          | -          | -          | -          | -          |
| <b>15</b>      | pulegone                  | 2.3                 | 4.4        | 0.3        | 9.3        | 4.5         | 2.2        | 2.8        | 3.7        | 0.4        | -          | -          |
| <b>16</b>      | estragole                 | 18.5                | 14.5       | 6.1        | 1.7        | 22.5        | 14.8       | 14.6       | 13.2       | -          | 70.6       | 47.1       |
| <b>17</b>      | <i>p</i> -ment-en-2-one   | -                   | 3.4        | 3.5        | 9.7        | 3.8         | 1.1        | 2.0        | 2.7        | 0.6        | -          | -          |
| <b>18</b>      | phellandral               | -                   | 1.1        | 2.3        | 4.1        | 1.4         | 1.6        | 1.1        | 1.3        | 0.2        | -          | -          |
| <b>20</b>      | <i>cis</i> -sabinol       | 4.7                 | 8.6        | 6.3        | 9.5        | 7.8         | 5.6        | 6.1        | 6.5        | 2.2        | -          | -          |
| <b>21</b>      | <i>p</i> -cymen-8-ol      | -                   | 3.0        | 1.7        | 3.5        | 5.2         | 2.0        | 1.8        | 1.8        | 0.8        | -          | 1.1        |
| <b>22</b>      | 2,3-pinandediol           | -                   | -          | -          | -          | 7.8         | 3.3        | 2.8        | 5.7        | 1.3        | -          | -          |
| <b>26</b>      | thymol                    | -                   | 5.9        | 9.1        | 14.7       | 4.8         | 6.7        | 3.7        | 4.6        | 1.2        | -          | -          |
| <b>27</b>      | myristicin                | -                   | -          | 2.2        | 5.6        | 1.6         | 0.8        | 1.0        | -          | 2.7        | 1.2        | 1.1        |
| <b>28</b>      | piperitenone oxide        | -                   | -          | 2.5        | 5.8        | 4.9         | 19.5       | 4.0        | -          | -          | 0.7        | -          |
|                | Unidentified compounds    | <b>0.8</b>          | <b>8.4</b> | <b>2.6</b> | <b>5.4</b> | <b>10.2</b> | <b>2.0</b> | <b>3.2</b> | <b>3.1</b> | <b>1.1</b> | <b>1.8</b> | <b>0.2</b> |

<sup>1</sup># indicates the compound identification number; <sup>2</sup> samples names were given by merging the month first letter and extraction time as reported in Table S2 or by merging the first letter of the month, the letter M (mixture) and serial number of the mix.

**Table S5.** Chemical composition (%) of the most active RSEO samples.

| # <sup>1</sup> | Name                       | Sample <sup>2</sup> |             |            |            |
|----------------|----------------------------|---------------------|-------------|------------|------------|
|                |                            | 1h                  | 3h          | 12h        | 30h        |
| 1              | <i>α</i> -pinene           | 3.9                 | 3.6         | 1.2        | -          |
| 2              | <i>β</i> -pinene           | 4.6                 | 3.4         | 1.5        | 0.1        |
| 3              | <i>β</i> -myrcene          | 0.9                 | 1.2         | 0.4        | -          |
| 4              | <i>α</i> -phellandrene     | -                   | -           | 5.4        | 0.6        |
| 5              | <i>d</i> -limonene         | 7.4                 | 6.7         | 1.2        | 0.3        |
| 6              | <i>β</i> -terpinene        | 3.0                 | 4.9         | 1.8        | 0.3        |
| 7              | <i>β</i> -ocimene          | 0.5                 | 1.3         | 0.8        | 0.2        |
| 8              | <i>o</i> -cymene           | 40.1                | 3.8         | 7.4        | 4.2        |
| 9              | terpinolene                | -                   | 2.1         | 1.6        | -          |
| 11             | borneol                    | -                   | 3.3         | 3.0        | 3.0        |
| 12             | pulegone                   | -                   | -           | 0.8        | 2.6        |
| 13             | citral                     | -                   | 1.0         | -          | -          |
| 14             | cryptone                   | -                   | 2.5         | -          | -          |
| 15             | <i>p</i> -menth-1-en-2-one | -                   | 2.2         | 2.1        | 9.7        |
| 17             | <i>cis</i> -sabinol        | -                   | 5.8         | 4.3        | 12.9       |
| 18             | <i>p</i> -cymen-8-ol       | 9.2                 | 13.4        | 3.0        | 6.4        |
| 19             | piperitenone oxide         | 6.5                 | 3.6         | 1.0        | 1.9        |
| 21             | 2,3-pinandediol            | 9.6                 | 1.8         | 2.1        | -          |
| 23             | myristicin                 | -                   | -           | 3.2        | 1.7        |
| 24             | apiol                      | 6.5                 | 21.1        | 59.2       | 56,1       |
|                | Unidentified compounds     | <b>7.8</b>          | <b>18.3</b> | <b>0.0</b> | <b>0.0</b> |

<sup>1</sup># indicates the compound identification number; <sup>2</sup> samples names indicate the extraction time as reported in Table S1.

**Table S6.** Arbitrary classification of 89 EOs samples in 4 different classes depending on their capability to impair biofilm formation.

| <b>Strong reduction<br/>(&lt; 40% residual<br/>biofilm)</b> |           |           | <b>Medium reduction<br/>(40-80% residual<br/>biofilm)</b> |           |           | <b>No reduction<br/>(80 - 100% residual<br/>biofilm)</b> |           |           | <b>Enhancer effect<br/>(&gt;100% residual<br/>biofilm)</b> |           |           |
|-------------------------------------------------------------|-----------|-----------|-----------------------------------------------------------|-----------|-----------|----------------------------------------------------------|-----------|-----------|------------------------------------------------------------|-----------|-----------|
| <b>FV</b>                                                   | <b>CG</b> | <b>RS</b> | <b>FV</b>                                                 | <b>CG</b> | <b>RS</b> | <b>FV</b>                                                | <b>CG</b> | <b>RS</b> | <b>FV</b>                                                  | <b>CG</b> | <b>RS</b> |
| FA1                                                         | COM2      |           | FA2                                                       | CJM3      | R1        | FO1                                                      | CA6       | RM1       |                                                            | CA1       |           |
| FA3                                                         |           |           | FA24                                                      | CJM4      | R2        |                                                          | CJ3       | RM3       |                                                            | CA2       |           |
| FA6                                                         |           |           | FAM5                                                      | CO1       | R3        |                                                          | CJM1      | RM4       |                                                            | CA3       |           |
| FA12                                                        |           |           | FS2                                                       | CO2       | R6        |                                                          | CJM5      |           |                                                            | CAM1      |           |
| FAM1                                                        |           |           | FS3                                                       | CO3       | R12       |                                                          | COM1      |           |                                                            | CAM3      |           |
| FAM2                                                        |           |           | FS6                                                       | CO6       | R24       |                                                          | COM3      |           |                                                            | CJ1       |           |
| FAM3                                                        |           |           | FS12                                                      | CO12      | R30       |                                                          | COM5      |           |                                                            | CJ2       |           |
| FAM4                                                        |           |           | FS24                                                      | CO24      | RM2       |                                                          | CS2       |           |                                                            | CJM2      |           |
| FS1                                                         |           |           | FSM2                                                      | CS1       | RM5       |                                                          | CS3       |           |                                                            | COM4      |           |
| FOM1                                                        |           |           | FSM3                                                      | CS12      | RM6       |                                                          | CSM1      |           |                                                            | CS6       |           |
| FOM4                                                        |           |           | FSM4                                                      | CS24      |           |                                                          |           |           |                                                            | CSM3      |           |
|                                                             |           |           | FSM5                                                      | CSM2      |           |                                                          |           |           |                                                            | CSM5      |           |
|                                                             |           |           | FO2                                                       | CSM4      |           |                                                          |           |           |                                                            |           |           |
|                                                             |           |           | FO3                                                       | CA12      |           |                                                          |           |           |                                                            |           |           |
|                                                             |           |           | FO6                                                       | CA24      |           |                                                          |           |           |                                                            |           |           |
|                                                             |           |           | FO12                                                      | CAM2      |           |                                                          |           |           |                                                            |           |           |
|                                                             |           |           | FO24                                                      | CAM4      |           |                                                          |           |           |                                                            |           |           |
|                                                             |           |           | FOM2                                                      | CAM5      |           |                                                          |           |           |                                                            |           |           |
|                                                             |           |           | FOM3                                                      | CJ6       |           |                                                          |           |           |                                                            |           |           |
|                                                             |           |           | FOM5                                                      | CJ12      |           |                                                          |           |           |                                                            |           |           |
|                                                             |           |           |                                                           | CJ24      |           |                                                          |           |           |                                                            |           |           |

FV: *Foeniculum vulgare*; CG: *Calamintha nepeta* subsp. *glandulosa*; RS: *Ridolfia segetum*.

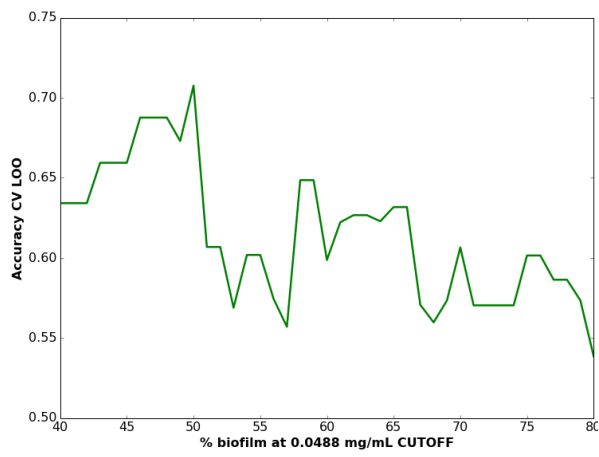

**A**

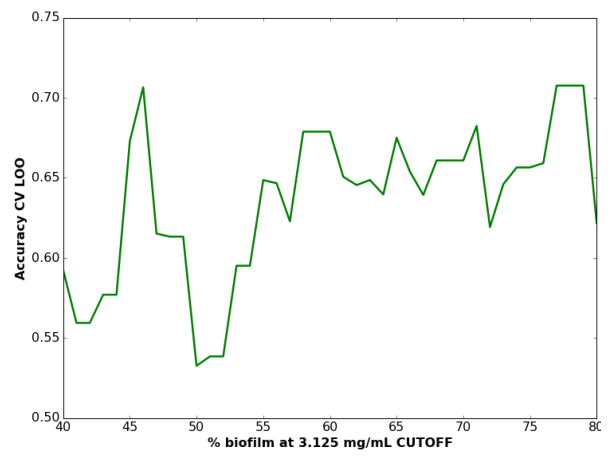

**B**

**Figure S1.** Analysis of best cutoff values for the GB classification models. A: at 48.8  $\mu\text{g/ml}$ ; B: at 3.125  $\text{mg/ml}$ .

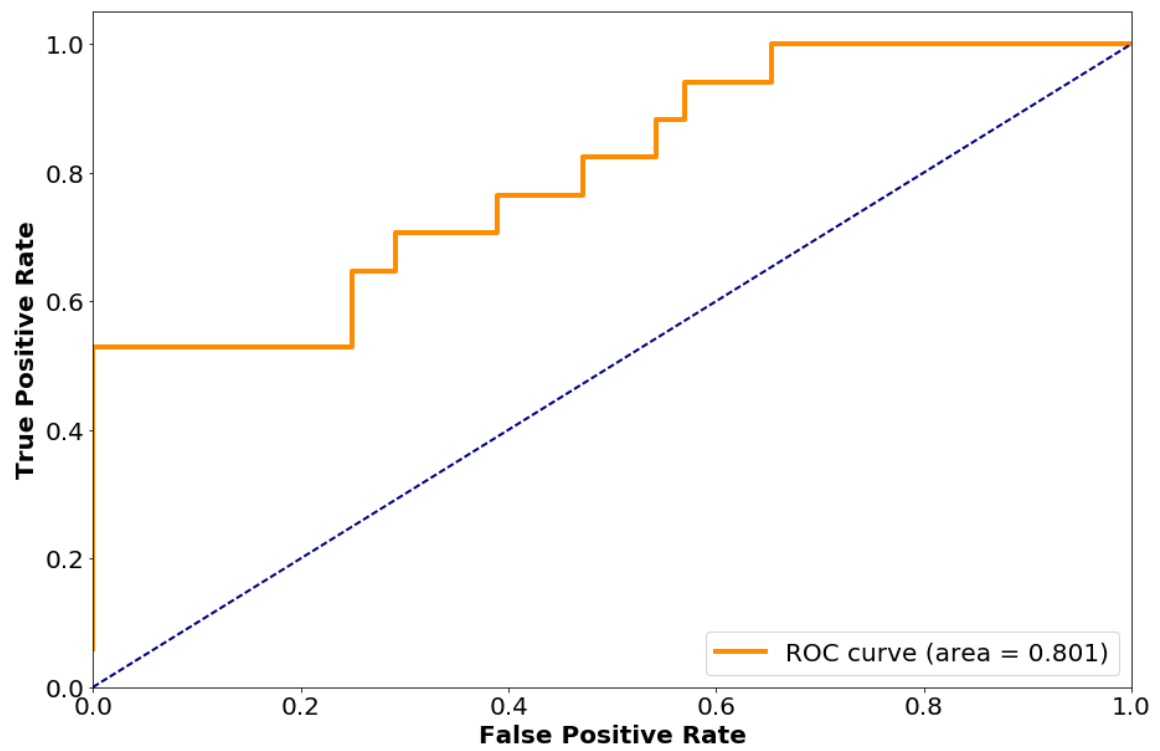

**Figure S2.** ROC curve for the GB classification model obtained for biofilm inhibition measured at 48.8  $\mu\text{g/ml}$ .



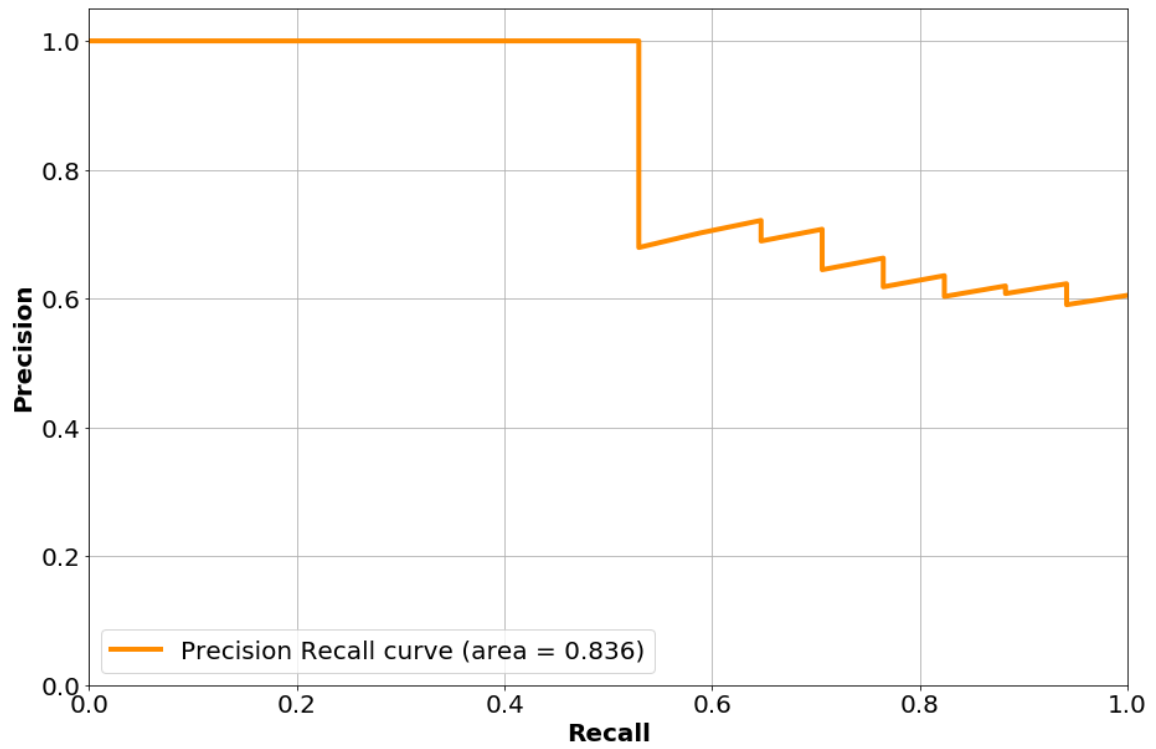

**Figure S3.** Precision Recall curve for the GB classification model obtained for biofilm inhibition measured at 48.8  $\mu\text{g/ml}$ .

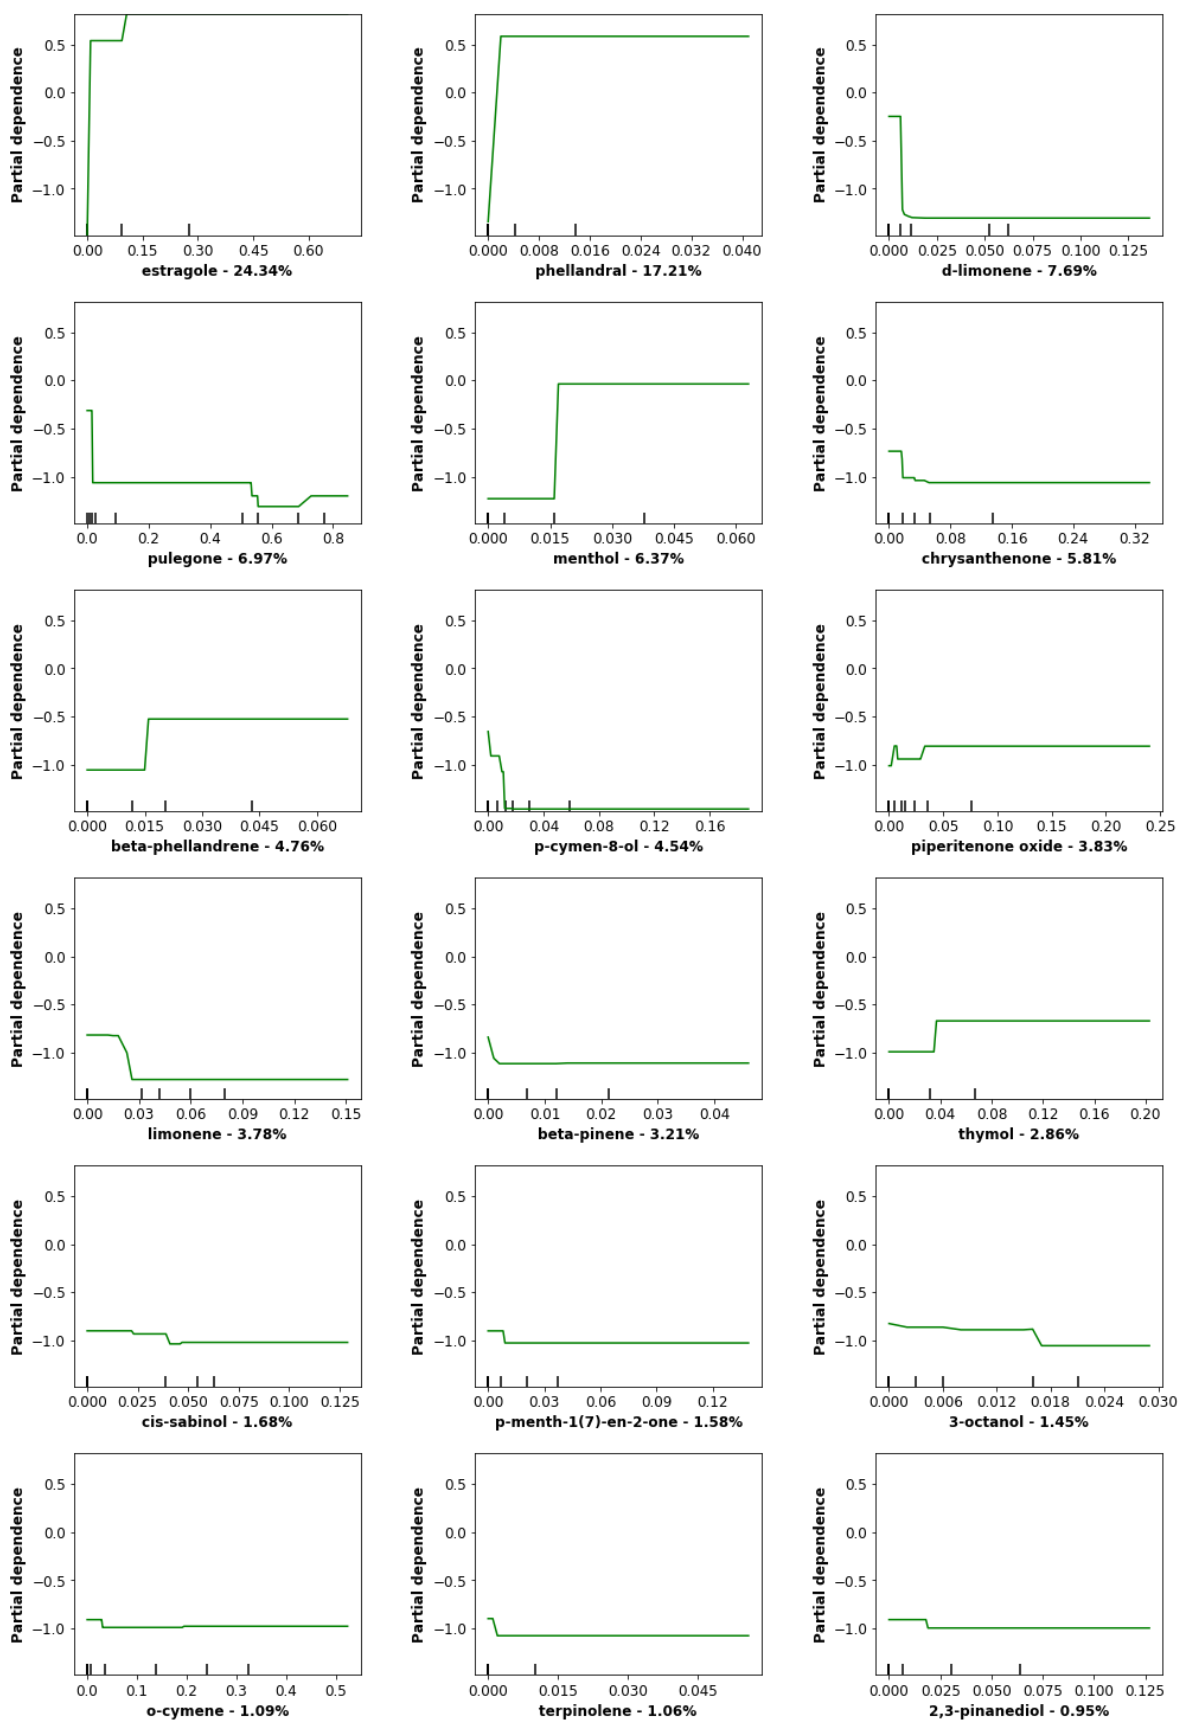

**Figure S4.** Partial Dependence plot obtained for the GB classification models at 48.8  $\mu\text{g/ml}$  for the first 18 EOs' chemical components

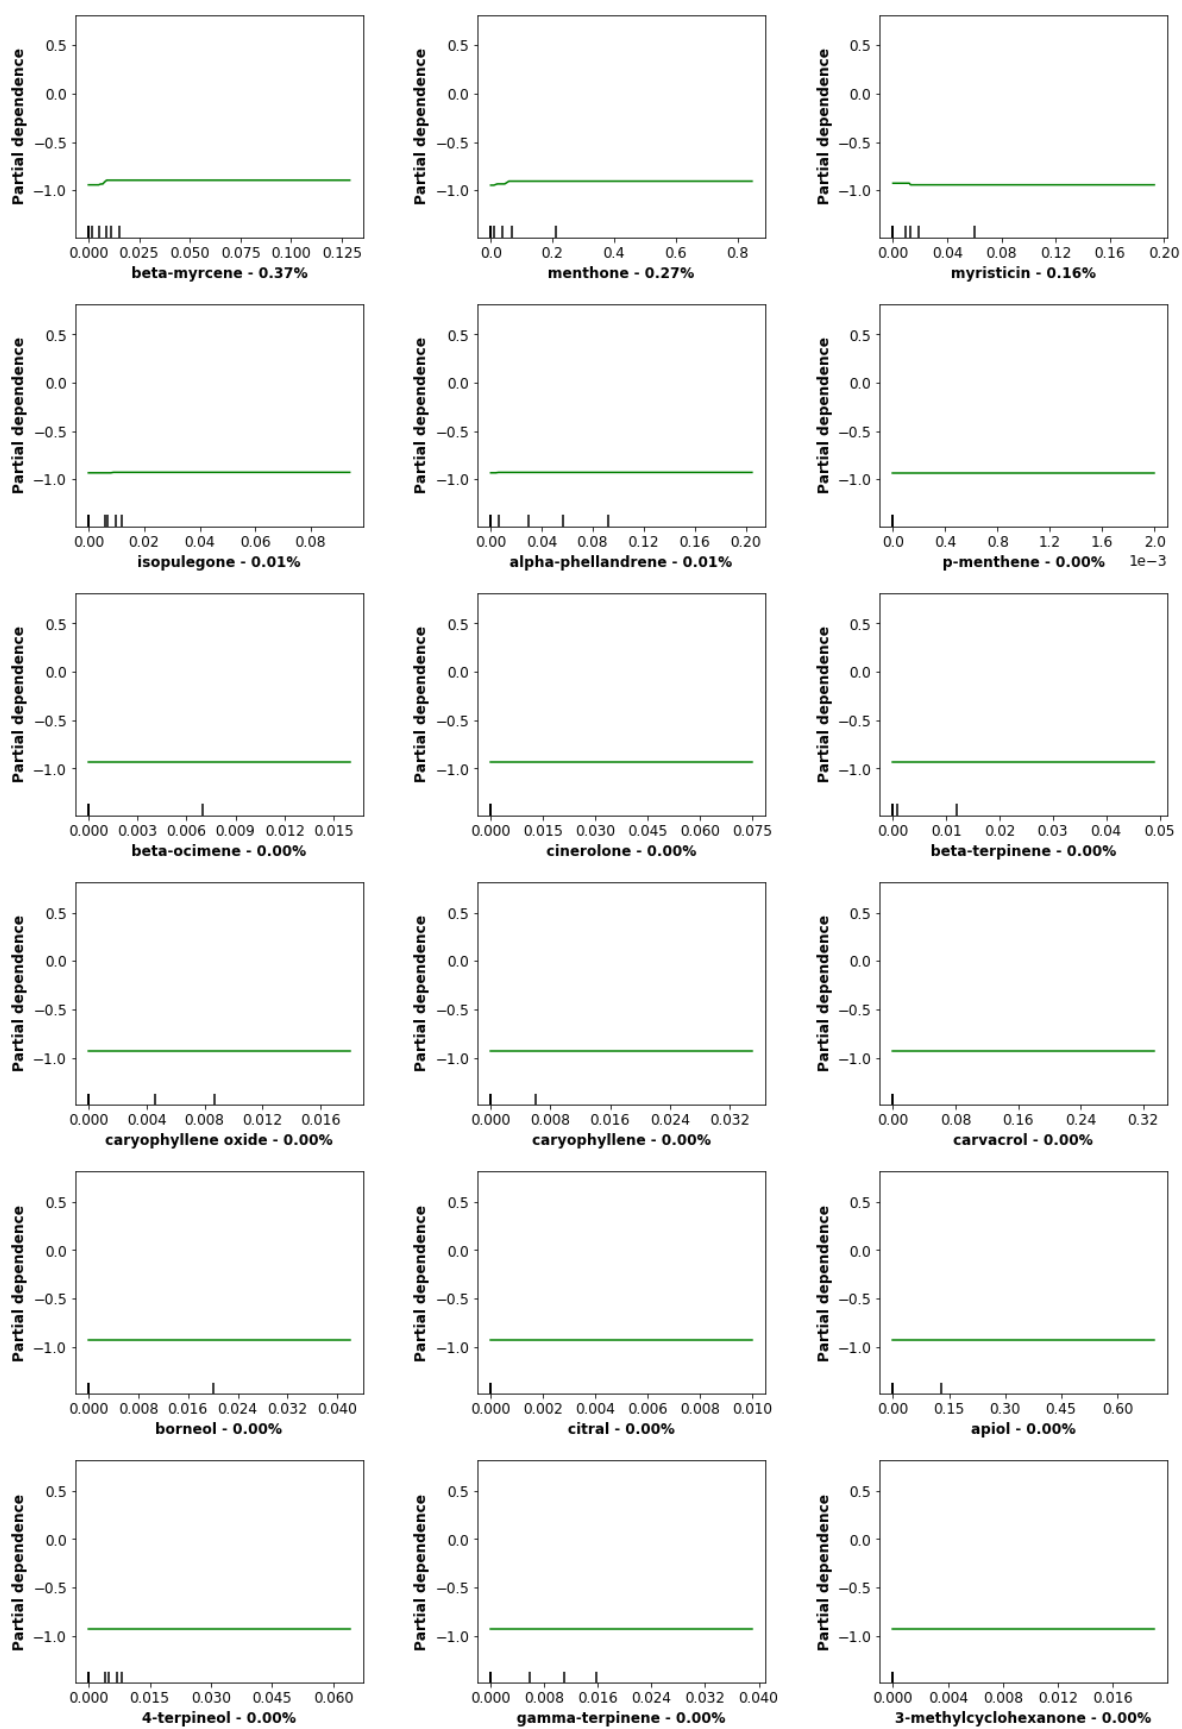

*continue* Figure S4. Partial Dependence plot obtained for the GB classification models at 48.8  $\mu\text{g/ml}$  for the second 18 EOs' chemical components

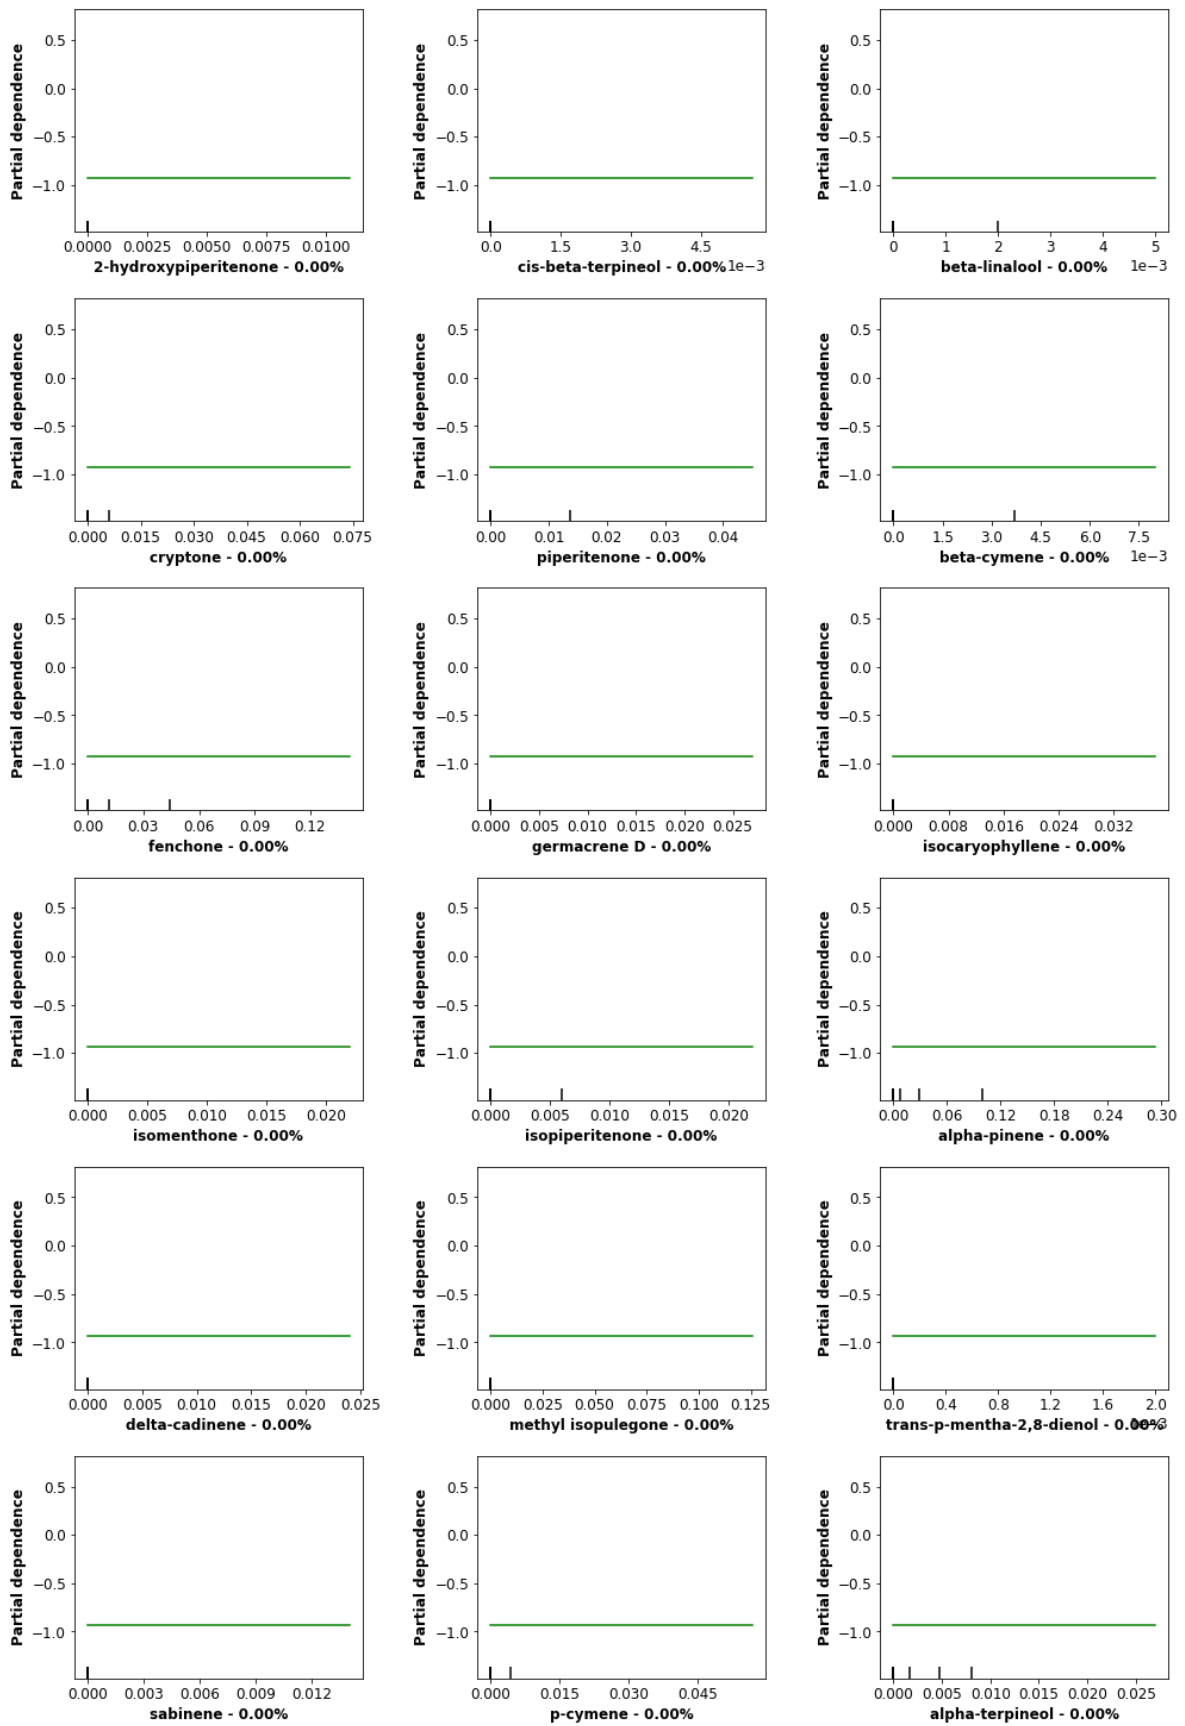

*continue* Figure S4. Partial Dependence plot obtained for the GB classification models at 48.8  $\mu\text{g/ml}$  for the last 18 EOs' chemical components



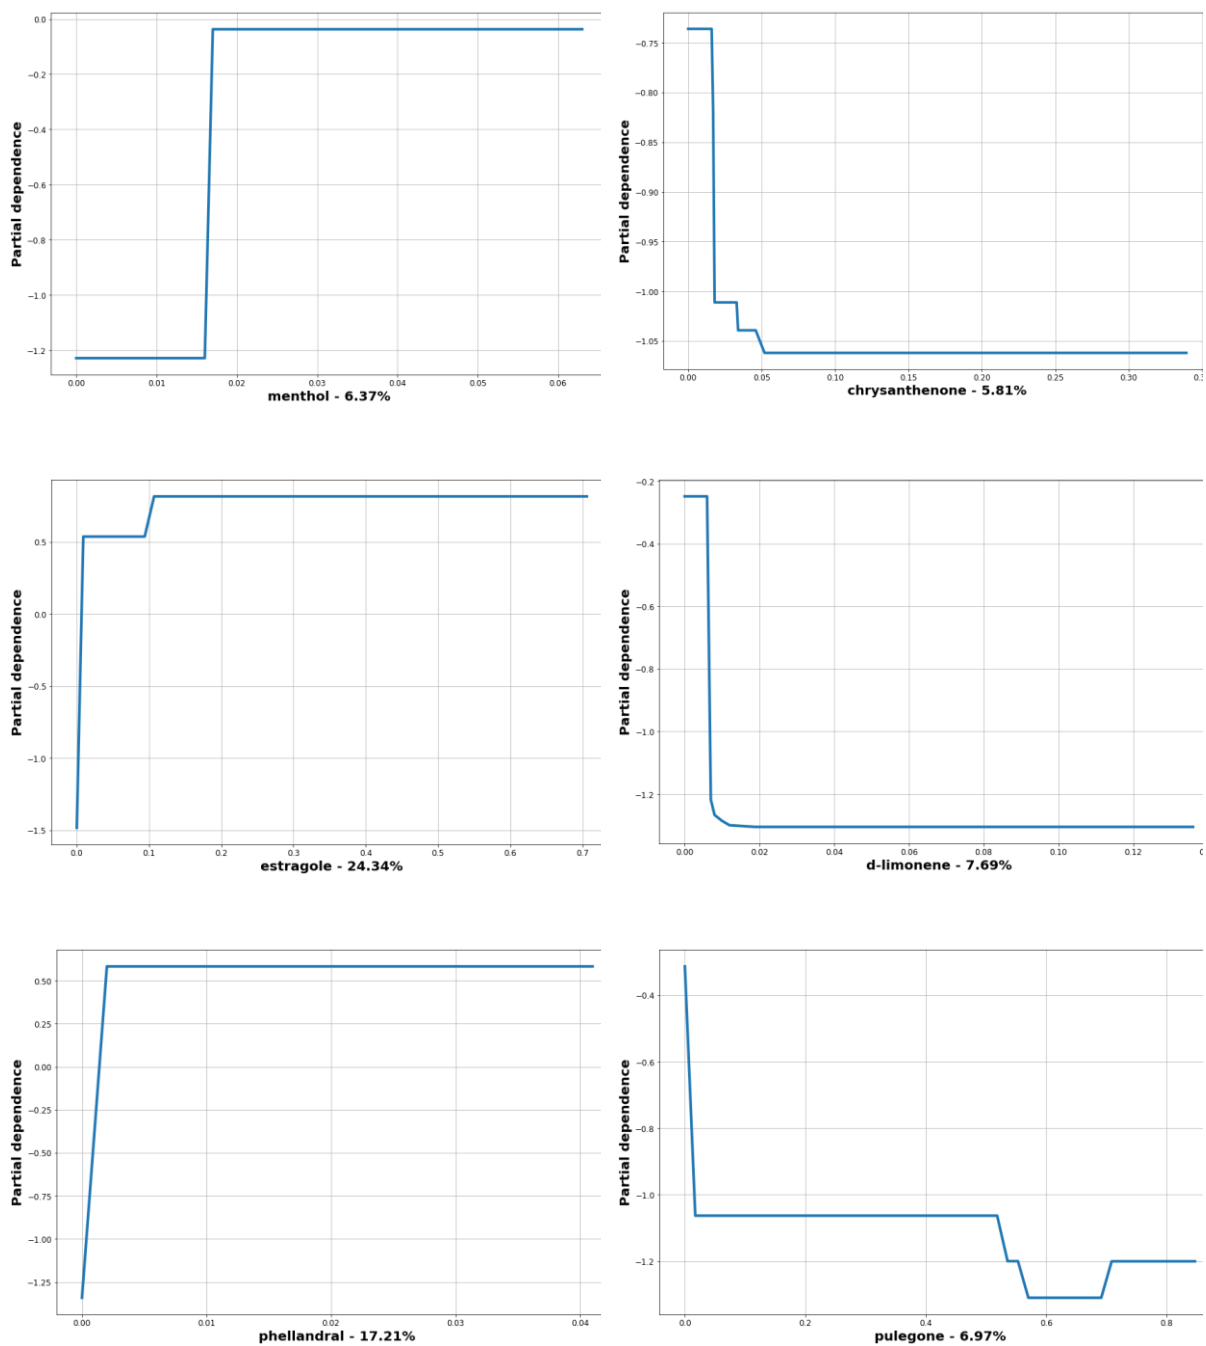

**Figure S5.** Partial Dependence plot obtained for the GB classification models at 48.8  $\mu\text{g/ml}$  for the most important chemical components.
